# Supplementary material for: Graphic Mining of High-Order Drug Interactions and Their Directional Effects on Myopathy Using Electronic Medical Records
Source: PubMed Central journal article supplement — CPT Pharmacometrics Syst Pharmacol. 2015 Jul 6;4(8):481–8. doi: 10.1002/psp4.59 (PMC4562164; doi:10.1002/psp4.59), 2015-07-06
Supplement: psp40004-0481-sd1.pdf [file psp40004-0481-sd1.pdf]

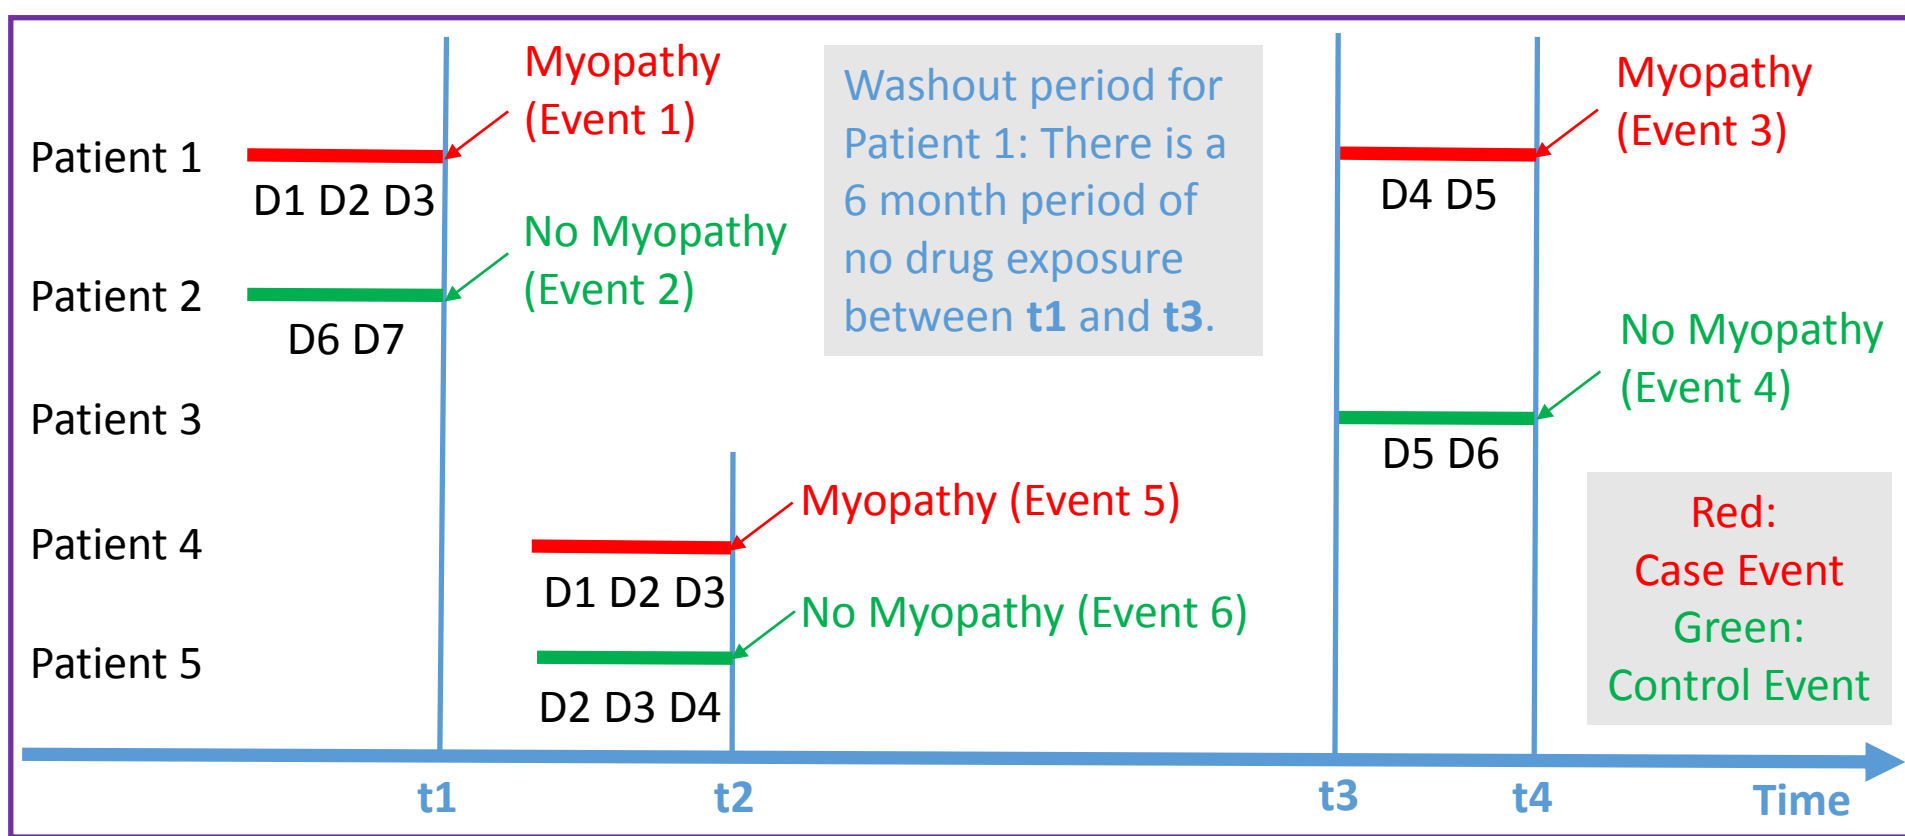

|         | D1 | D2 | D3 | D4 | D5 | D6 | D7 | Myopathy |
|---------|----|----|----|----|----|----|----|----------|
| Event 1 | 1  | 1  | 1  | 0  | 0  | 0  | 0  | 1        |
| Event 2 | 0  | 0  | 0  | 0  | 0  | 1  | 1  | 0        |
| Event 3 | 0  | 0  | 0  | 1  | 1  | 0  | 0  | 1        |
| Event 4 | 0  | 0  | 0  | 0  | 1  | 1  | 0  | 0        |
| Event 5 | 1  | 1  | 1  | 0  | 0  | 0  | 0  | 1        |
| Event 6 | 0  | 1  | 1  | 1  | 0  | 0  | 0  | 0        |

**Supplemental Figure 1.** Schematic representation of an example timeline (top panel) and the corresponding event-drug matrix (bottom panel). The horizontal red and green lines corresponds to the one month drug exposure windows for myopathy (case) events and no-myopathy (control) events, respectively. For Patient 1, Event 3 is included as a new case event, since there is a washout period (i.e., 6 months of no drug exposure) between  $t_1$  and  $t_3$ .
